# Supplementary material for: Bioelectrochemical Changes During the Early Stages of Chalcopyrite Interaction with<em> Acidithiobacillus thiooxidans </em>and<em> Leptospirillum </em>sp.
Source: Preprints.org preprint supplement (doi:10.20944/preprints201707.0063.v1), 2017-07-21
Supplement: Supplementary file 1 [file supplementary]

# Supplementary Materials

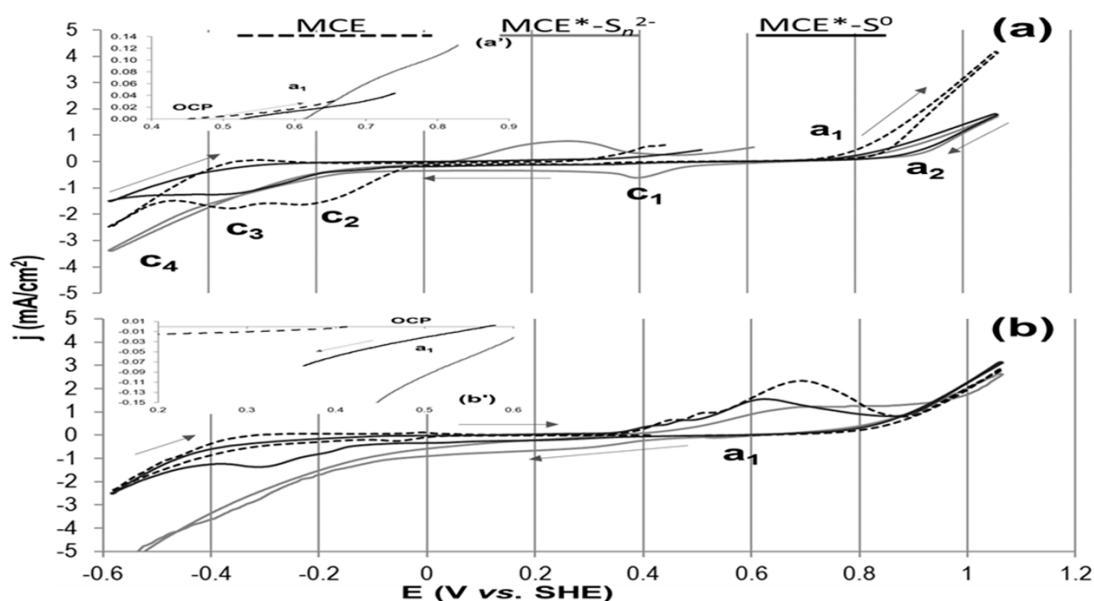

**Figure S1:** Voltammograms in positive (a) and negative (b) potential sweep of pristine MCE (dotted line), and electrooxidized EMC at 695 mV,  $\text{MCE}^*-\text{S}_n^{2-}$  (gray line), and at 915 mV,  $\text{MCE}^*-\text{S}^0$  (black line), in ATCC-125 medium pH 2. Scan rate: 20 mV/s with stirring; the potential scan was initiated at the OCP.

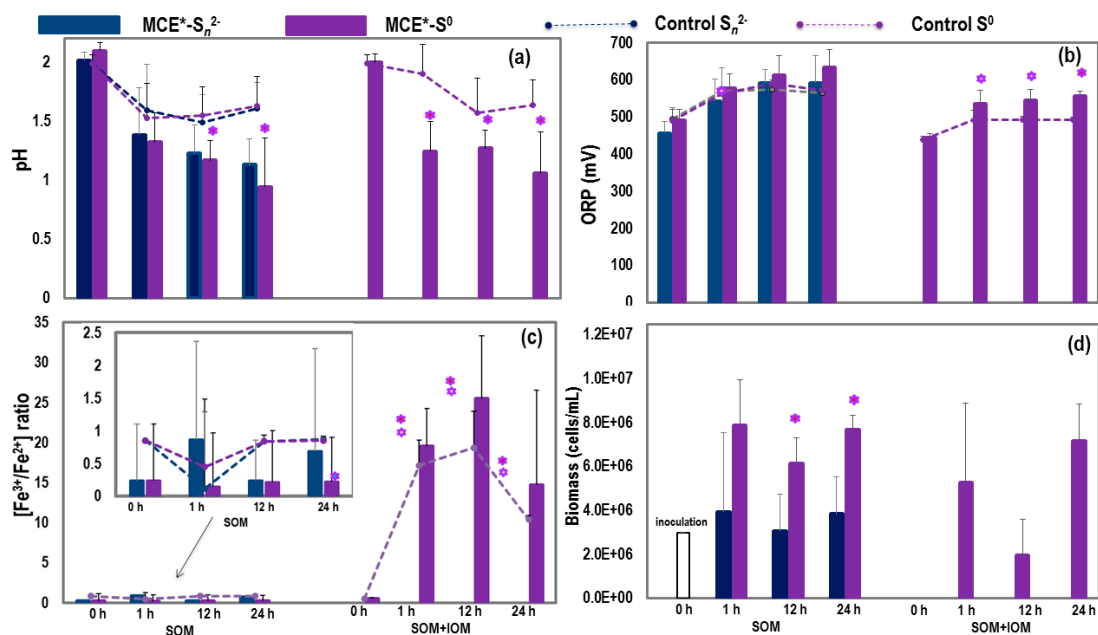

**Figure S2:** Certain characteristics of the media as electrolyte (after 1, 12 and 24 h of the exposure of  $\text{MCE}^*-\text{S}_n^{2-}$  (blue) and  $\text{MCE}^*-\text{S}^0$  (purple) to SOM or SOM+IOM media (abiotic controls; dotted lines) and cultures (biotic; columns): pH (a); ORP (b), soluble  $\text{Fe}^{3+}/\text{Fe}^{2+}$  (c), and biomass of non-attached bacteria (d). Data: Average values ( $n=3$ ) and standard deviation (error bars). \*: Values significantly different from both, controls and surficial SRS ( $-\text{S}_n^{2-}$  or  $-\text{S}^0$ )
